# Supplementary material for: Factors Affecting Migration Intentions of Polish Physiotherapists and Students of Physiotherapy—A Cross-Sectional Study
Source: Int J Environ Res Public Health. 2022 Nov 6;19(21):14556. doi: 10.3390/ijerph192114556 (PMC9658116; doi:10.3390/ijerph192114556)
Supplement: Supplementary file 1 [file ijerph-19-14556-s001.zip › ijerph-1997298-supplementary.pdf]

## SUPPLEMENTARY MATERIALS

**Table S1.** Results of statistical analyzes among students of physiotherapy

| variable               | migration plans |      |            |      | p                  |
|------------------------|-----------------|------|------------|------|--------------------|
|                        | no (n=64)       |      | yes (n=53) |      |                    |
|                        | n               | %    | n          | %    |                    |
| Sex, n (%)             |                 |      |            |      |                    |
| woman                  | 56              | 58.3 | 40         | 41.7 | 0.092 <sup>A</sup> |
| man                    | 8               | 38.1 | 13         | 61.9 |                    |
| Marital status, n (%)  |                 |      |            |      |                    |
| lonely person          | 35              | 48.6 | 37         | 51.4 | 0.094 <sup>A</sup> |
| person in relationship | 29              | 64.4 | 16         | 35.6 |                    |
| Year of study, n (%)   |                 |      |            |      |                    |
| 4 <sup>th</sup> year   | 32              | 55.2 | 26         | 44.8 | 0.919 <sup>A</sup> |
| 5 <sup>th</sup> year   | 32              | 54,2 | 27         | 45.8 |                    |

Data are presented as A - p-value from X<sup>2</sup> test
